# Supplementary material for: Modelling the nutritional implications of ozone on wheat protein and amino acids
Source: Copernicus journal article supplement (doi:10.5194/egusphere-2024-2968), 2024-10-10
Supplement: Supplementary file 1 [file egusphere-2024-2968-supplement.pdf]

## Comparison of meteorological inputs for 2017 and 2018

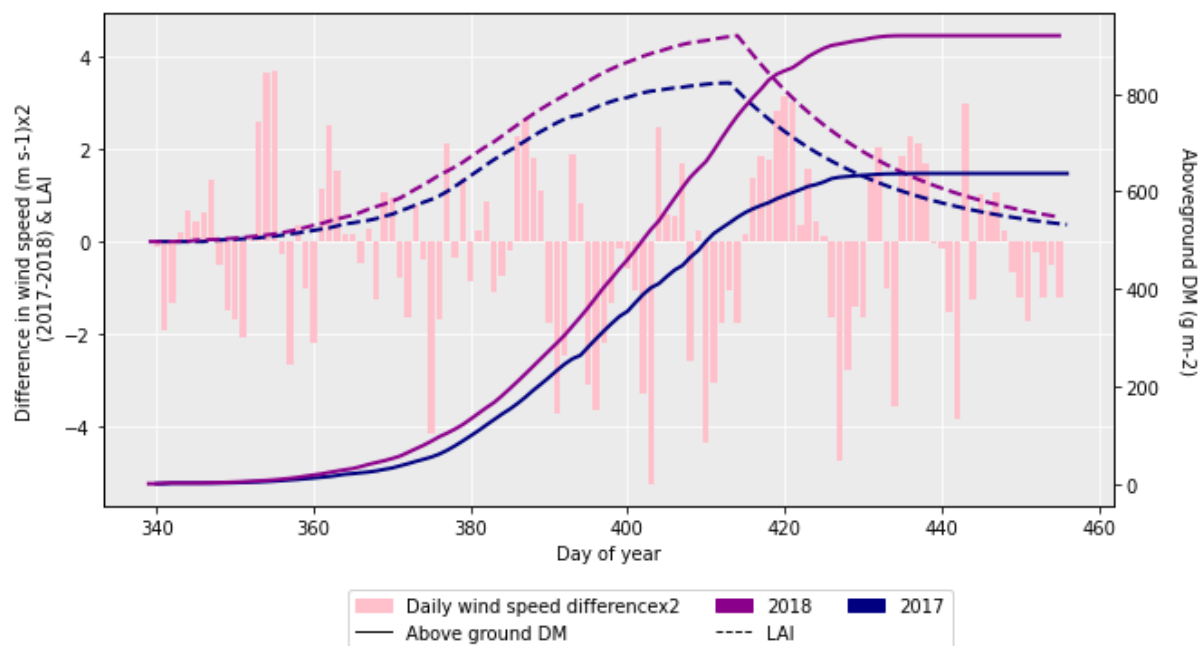

Fig S1: Daily mean difference in wind speed multiplied by 2, along with the difference in aboveground DM and LAI for the model run using the parameterisation noted “calibration method 2”, which used all available data.

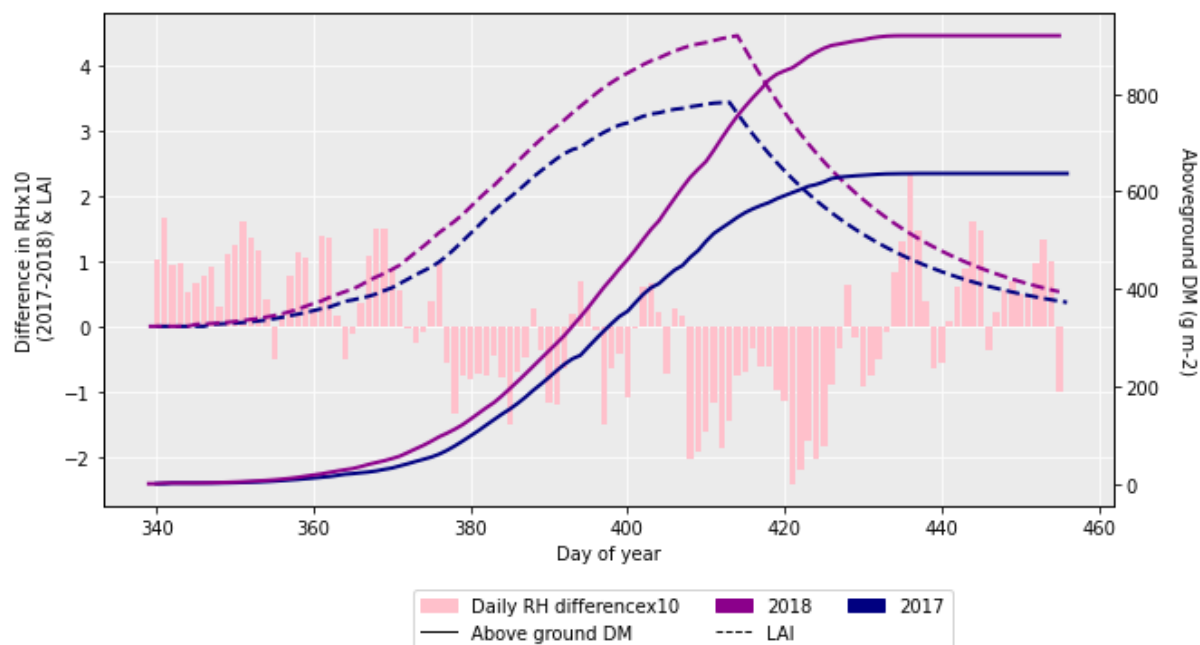

Fig. S2: Daily mean difference in RH multiplied by 10, along with the difference in aboveground DM and LAI for the model run using the parameterisation noted “calibration method 2”, which used all available data.

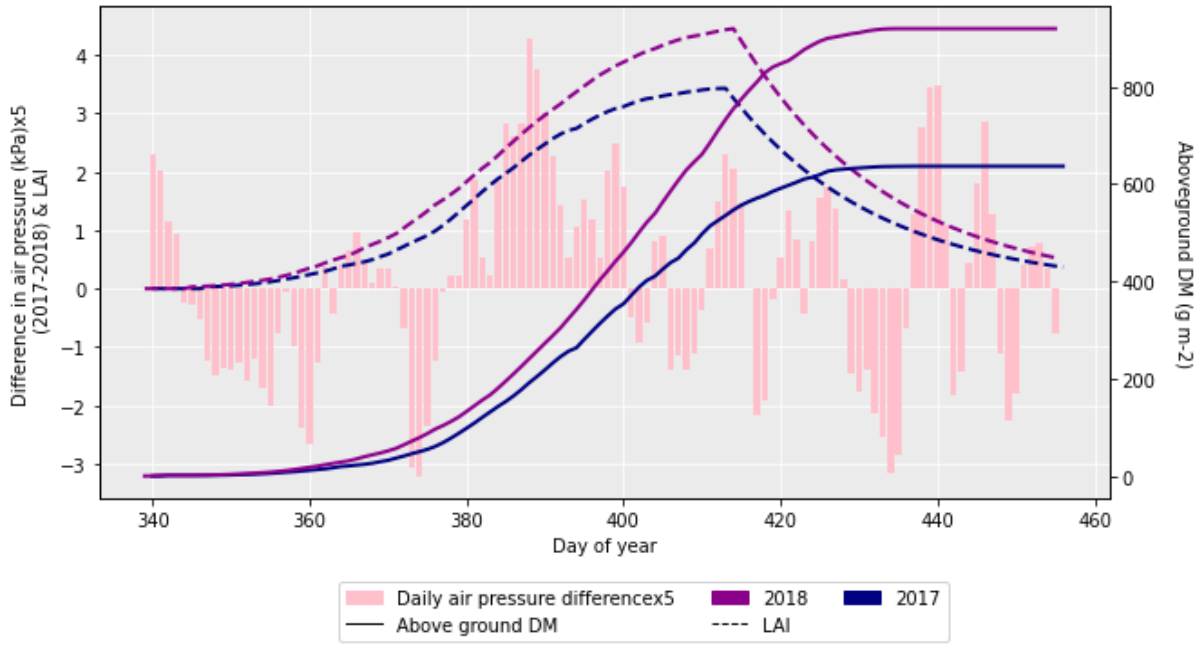

Fig. S3: Daily mean difference in air pressure multiplied by 5, along with the difference in aboveground DM and LAI for the model run using the parameterisation noted “calibration method 2”, which used all available data.

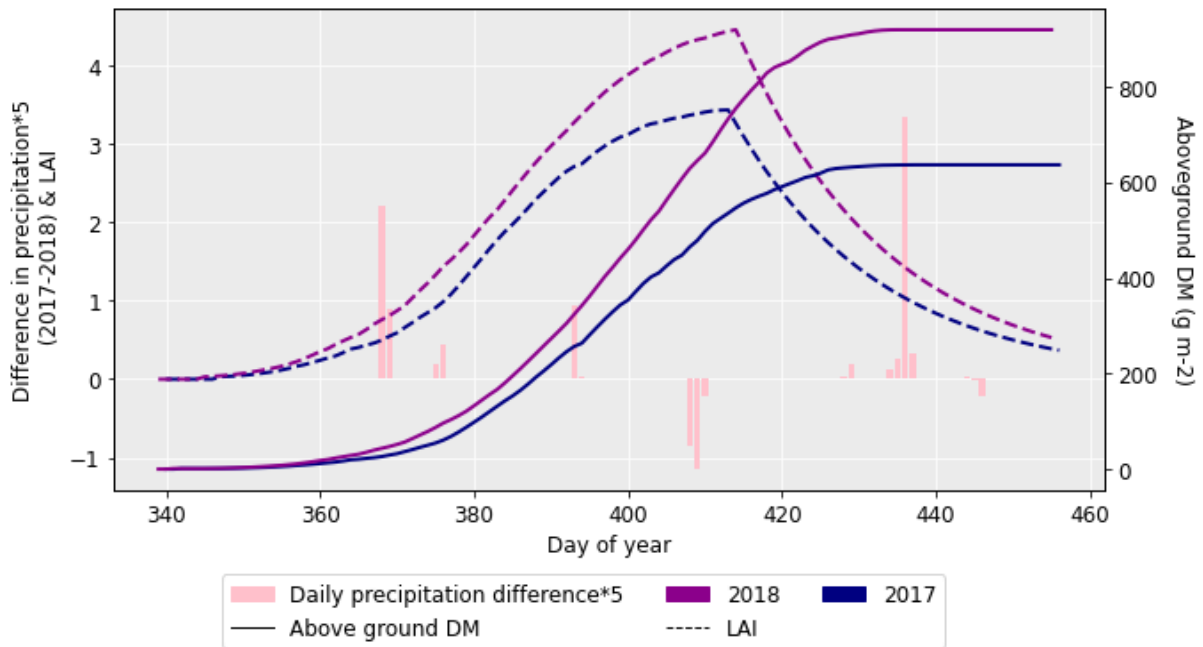

Fig. S4: Daily mean difference in precipitation multiplied by 5, along with the difference in aboveground DM and LAI for the model run using the parameterisation noted “calibration method 2”, which used all available data. Wheat was assumed to be irrigated so lack of rain was not an issue in model runs

## Comparison of photosynthetic processes

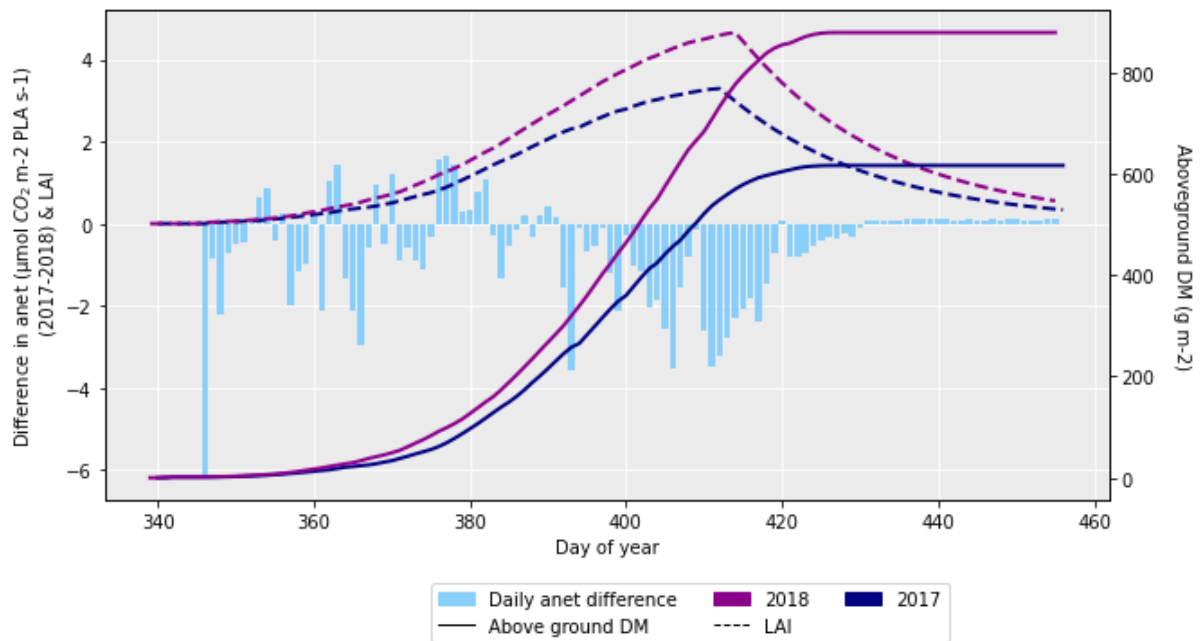

Fig. S5: The difference in net photosynthetic rate for 2017 and 2018 along with the difference in aboveground DM accumulation and LAI for the ambient treatment for the 2 years. The LAI and aboveground DM profiles are for the HD3118 cultivar.

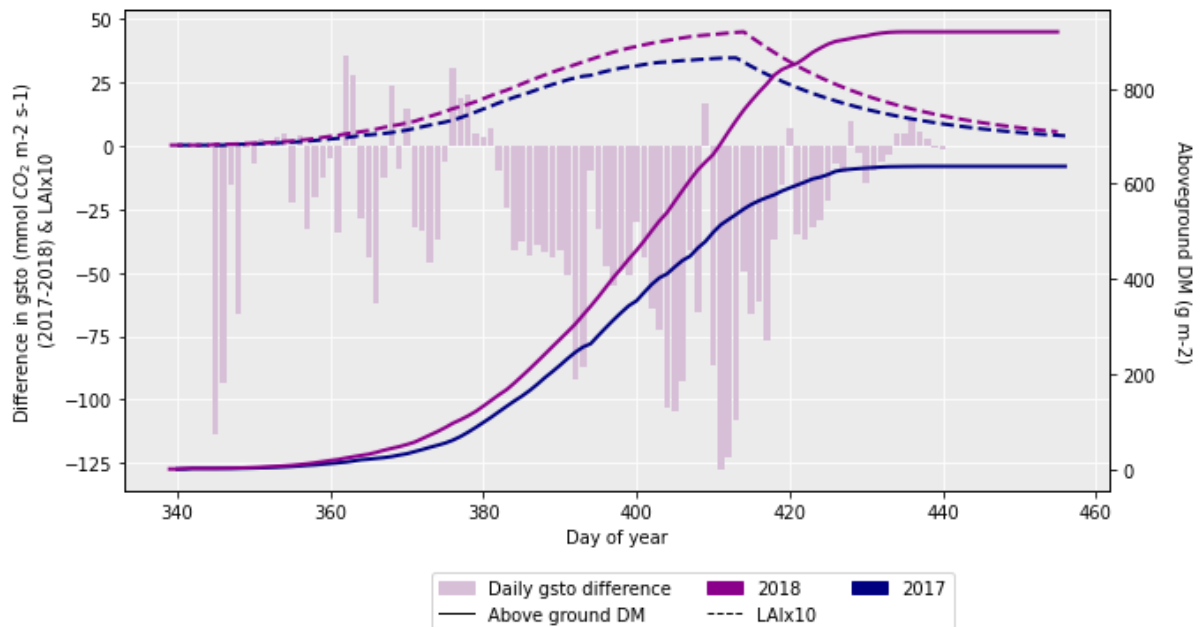

Fig. S6: The difference in sunlit stomatal conductance for 2017 and 2018 HUW234 cultivar along with the aboveground DM accumulation and LAI for both years. This run used the parameterisation of “calibration method 2” where all available data was used for calibration

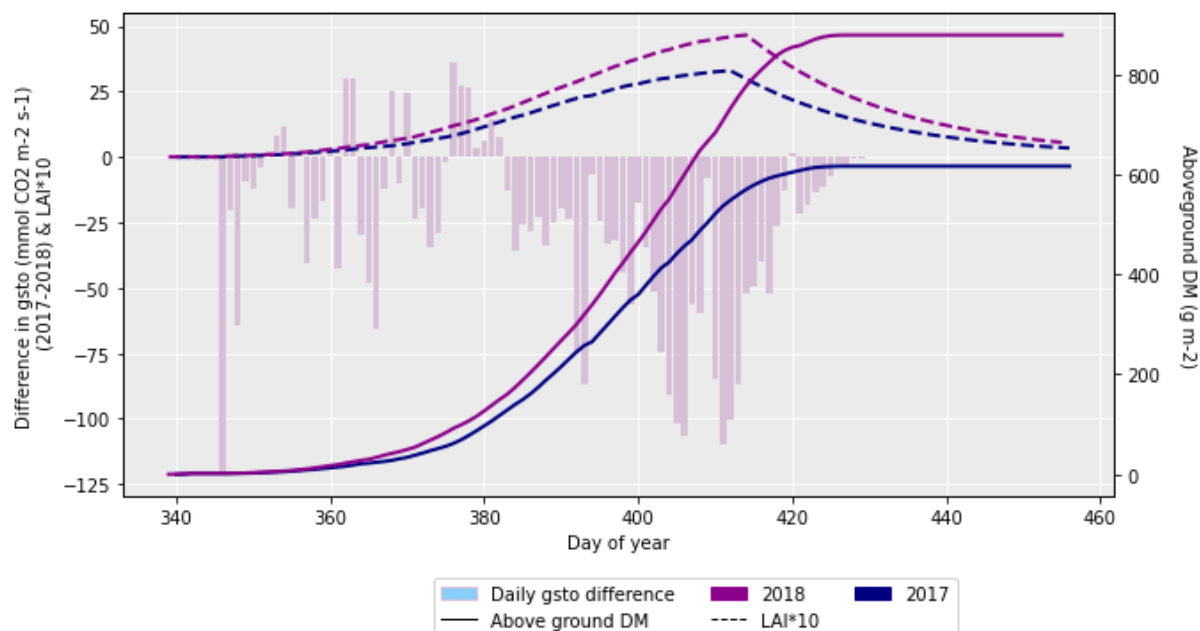

Fig. S7: The difference in sunlit stomatal conductance for 2017 and 2018 HD3118 cultivar along with the aboveground DM accumulation and LAI for both years. This run used the parameterisation of “calibration method 2” where all available data was used for calibration

## Model calibration

Initially, the input data was split into 2 groups. The 2017 data was used to calibrate the model and the 2018 data was used to evaluate the model. However, with such limited data the 2017 calibration dataset was subject to overfitting and the parameterisation obtained in the calibration did not give good results for the 2018 evaluation dataset. The parameterisation using the 2017 data for calibration and 2018 for evaluation is referred to as calibration method 1, and the parameterisation used in the main body of the paper, which used all available data to develop a parameterisation, is referred to as calibration method 2.

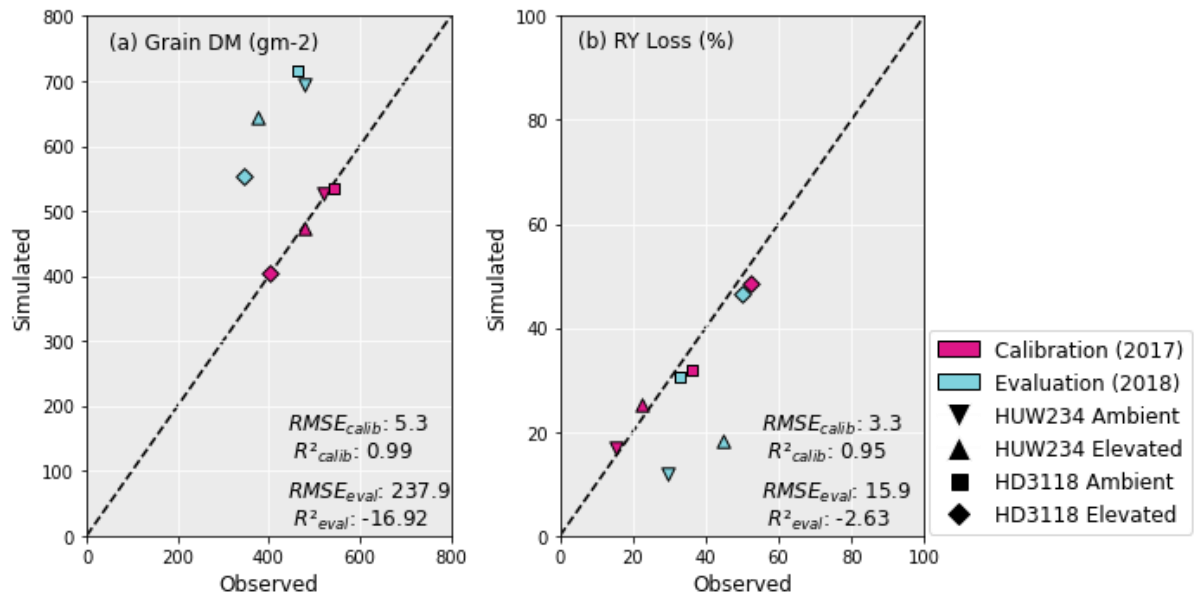

Figure S8: Calibration and evaluation of grain DM and RY loss using the DO<sub>3</sub>SE-Crop model for the Varanasi dataset when using calibration method 1. RY loss was calculated comparative to preindustrial O<sub>3</sub> concentrations of 10 ppb (CLRTAP, 2017).

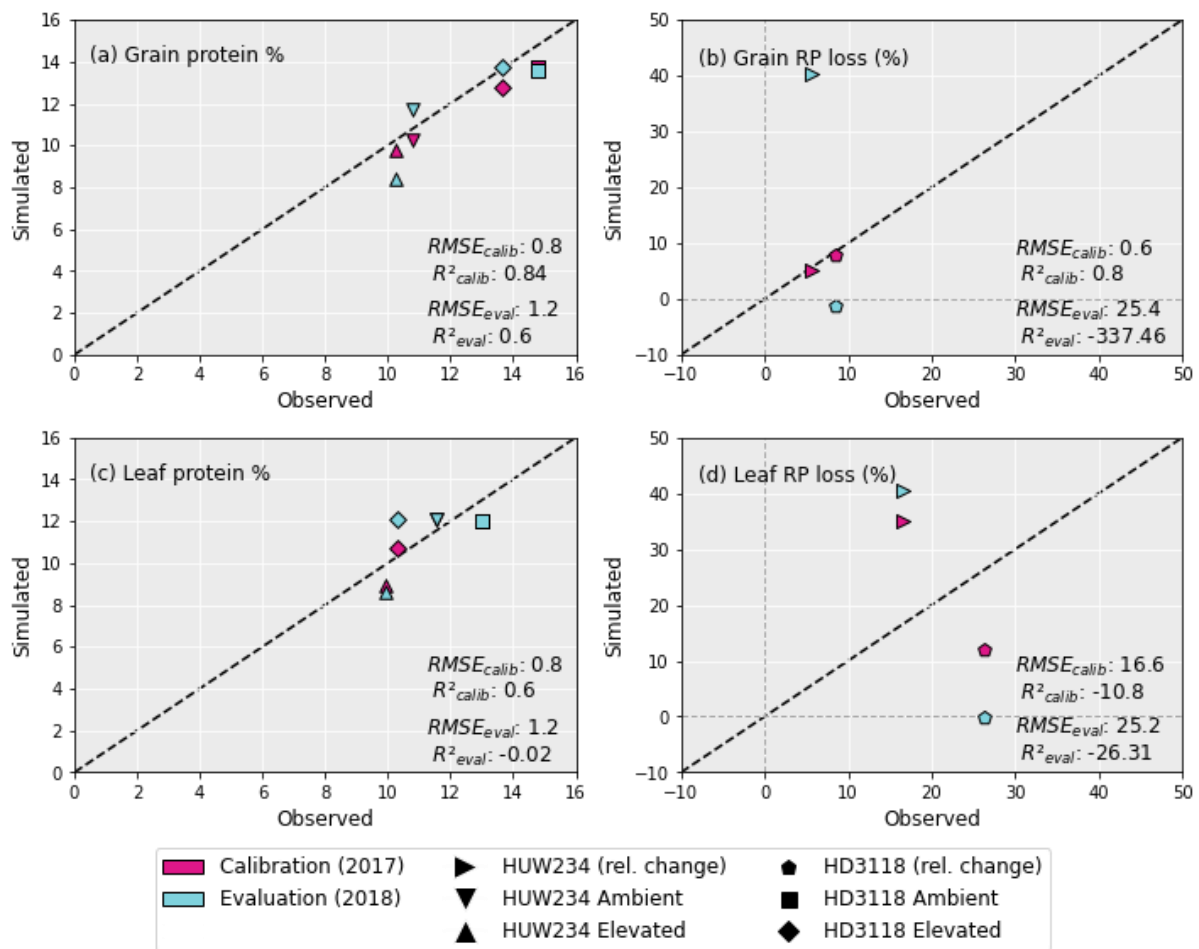

Fig. S9: Calibration and evaluation of the concentration of grain (a) and leaf (c) protein of HUW234 and HD3118 cultivars under ambient and elevated O<sub>3</sub>. Calibration and evaluation of the relative change in grain (b) and leaf (d) protein percentage. In figure (c) the ambient leaf protein % for the HUW234 and HD3118 cultivars in the calibration and evaluation were almost identical, hence the overlaid points. RMSE and R<sup>2</sup> of both the calibration and evaluation are indicated on the plot. These results use calibration method 1.

## Correcting for the heating effect of the open top chamber

Data on the internal chamber and ambient air temperatures in Delhi, over the course of the wheat growing season in December 2018 to March 2019 were regressed against each other to obtain a regression with which to correct the input temperature data in the present study, as the air temperature sensor was external to the chambers.

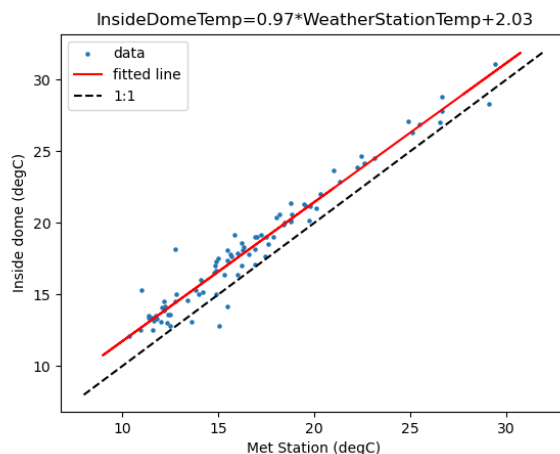

Figure S10: Regression between the air temperature as measured at the meteorological weather monitoring station and internal to the open top chambers in Delhi, during the wheat growth period 2018 to 2019. On average the open top chambers were approximately 2 degrees warmer than the ambient air.

## Model parameterisation for calibration methods 1 and 2

Both the HUW234 and HD3118 cultivars were ran assuming the number of layers in the canopy was 4, and that there was 1 leaf population ( $nL=4$ ,  $nP=1$ ). The HUW234 cultivar parameterisation is given in Table S1, and the HD3118 cultivar parameterisation is given in Table S2.

Table S1: The parameters that were calibrated for (changed from the default parameterisation) in  $DO_3SE-CropN$  Model for both calibration methods for the HUW234 cultivar

| Process         | Parameter description                                                                    | Calibrated Values |          | Unit                         |
|-----------------|------------------------------------------------------------------------------------------|-------------------|----------|------------------------------|
|                 |                                                                                          | Method 1          | Method 2 |                              |
| Phenology       | Base temperature ( $T_b$ )                                                               | 7                 | 7        | $^{\circ}C$                  |
|                 | Optimum temperature ( $T_o$ )                                                            | 25.99             | 25.99    | $^{\circ}C$                  |
|                 | Maximum temperature ( $T_m$ )                                                            | 42.637            | 42.637   | $^{\circ}C$                  |
|                 | Plant emergence ( $TT_{emr}$ )                                                           | 80                | 80       | $^{\circ}C$ days             |
|                 | Flag emergence ( $TT_{flag,emr}$ )                                                       | 792               | 792      | $^{\circ}C$ days             |
|                 | Start anthesis ( $TT_{astart}$ )                                                         | 1109              | 1109     | $^{\circ}C$ days             |
|                 | Mid-anthesis ( $TT_{amid}$ )                                                             | 1181              | 1181     | $^{\circ}C$ days             |
|                 | Harvest ( $TT_{harv}$ )                                                                  | 1668              | 1668     | $^{\circ}C$ days             |
| Photo-synthesis | Maximum carboxylation capacity at 25 $^{\circ}C$ ( $V_{cmax,25}$ )                       | 99.3              | 99.3     | $\mu mol CO_2 m^{-2} s^{-1}$ |
|                 | Leaf vertical N co-efficient (kN)                                                        | 0                 | 0        | -                            |
|                 | Maximum rate of electron transport at 25 $^{\circ}C$ ( $J_{max,25}$ )                    | 138               | 138      | $\mu mol CO_2 m^{-2} s^{-1}$ |
|                 | Parameter describing the variation in relative stomatal conductance with VPD ( $VPD_0$ ) | 2.95              | 2.75     | kPa                          |
|                 | m ( $m$ )                                                                                | 7.4               | 7.4      | -                            |
| Respiration     | dark respiration ( $R_{dcoeff}$ )                                                        | 0.00972           | 0.00972  | -                            |
|                 | growth respiration ( $R_g$ )                                                             | 0.15              | 0.15     | -                            |

|                                                                                                               |                                                                                             |                                                            |           |                        |
|---------------------------------------------------------------------------------------------------------------|---------------------------------------------------------------------------------------------|------------------------------------------------------------|-----------|------------------------|
| DM parameters                                                                                                 | Coefficient for determining DM partitioning ( $\alpha_{root}$ )                             | 16.5                                                       | 16.64     | -                      |
|                                                                                                               | Coefficient for determining DM partitioning ( $\beta_{root}$ )                              | -21                                                        | -20.5     | -                      |
|                                                                                                               | Coefficient for determining DM partitioning ( $\alpha_{leaf}$ )                             | 20.477                                                     | 18        | -                      |
|                                                                                                               | Coefficient for determining DM partitioning ( $\beta_{leaf}$ )                              | -24.5                                                      | -20       | -                      |
|                                                                                                               | Coefficient for determining DM partitioning ( $\alpha_{stem}$ )                             | 16.853                                                     | 15.48     | -                      |
|                                                                                                               | Coefficient for determining DM partitioning ( $\beta_{stem}$ )                              | -17                                                        | -14.69    | -                      |
|                                                                                                               | Coefficient determining specific leaf area ( $\Omega$ )                                     | 22.2                                                       | 22.2      | $m^2 kg^{-1}$          |
|                                                                                                               | Fraction of stem carbon in the reserve pool ( $\tau$ )                                      | 0.75                                                       | 0.75      | -                      |
|                                                                                                               | Fraction of DM in the harvest pool that goes to the grains (rest goes to the ear) ( $E_g$ ) | 0.85                                                       | 0.85      | -                      |
|                                                                                                               | Ozone damage                                                                                | O <sub>3</sub> long term damage coefficient ( $\gamma_3$ ) | 0.0000325 | 0.0000325              |
| O <sub>3</sub> long term damage coefficient determining senescence onset ( $\gamma_4$ )                       |                                                                                             | 4.2553                                                     | 3.1811    | -                      |
| O <sub>3</sub> long term damage coefficient determining maturity ( $\gamma_5$ )                               |                                                                                             | 0.944                                                      | 0.7742    | -                      |
| Critical accumulated stomatal O <sub>3</sub> flux that determines the onset of leaf senescence ( $cL_{O_3}$ ) |                                                                                             | 8000                                                       | 8500      | $mmol O_3 m^{-2}$      |
| N uptake                                                                                                      | Pre-anthesis maximum N uptake ( $NUP_{pre,max}$ )                                           | 0.55                                                       | 0.55      | $g N m^{-2} day^{-1}$  |
|                                                                                                               | Post-anthesis maximum N uptake ( $NUP_{post,max}$ )                                         | 0.3                                                        | 0.3       | $g N m^{-2} day^{-1}$  |
| Leaf and stem N parameters                                                                                    | Target leaf N concentration ( $[N_{leaf,target}]$ )                                         | 1                                                          | 1         | $g N m^{-2} leaf area$ |
|                                                                                                               | Target stem N concentration ( $[N_{stem,target}]$ )                                         | 0.017                                                      | 0.017     | $N g^{-1} DW$          |



|                       |                                                                                                              |        |        |                                     |
|-----------------------|--------------------------------------------------------------------------------------------------------------|--------|--------|-------------------------------------|
|                       | Ratio of N in grain to ear<br>( $f_{N,ear\_grain}$ )                                                         | 0.95   | 0.95   | -                                   |
| Grain N parameters    | Alpha parameter controlling sigmoid N grain filling function ( $\alpha_N$ )                                  | 23     | 23     | -                                   |
|                       | Beta parameter controlling sigmoid N grain filling function ( $\beta_N$ )                                    | 1.2    | 1.2    | -                                   |
| N re-mobilisation     | Gradient of N remobilisation from the leaf under O <sub>3</sub> exposure ( $m_{leaf}$ )                      | 0.6    | 0.2    | -                                   |
|                       | Intercept of N remobilisation from the leaf under O <sub>3</sub> exposure ( $c_{leaf}$ )                     | 10.89  | 10.89  | -                                   |
|                       | Gradient of N remobilisation from the stem under O <sub>3</sub> exposure ( $m_{stem}$ )                      | 0.0325 | 0.0325 | -                                   |
|                       | Intercept of N remobilisation from the stem under O <sub>3</sub> exposure ( $c_{stem}$ )                     | 0.2293 | 0.2293 | -                                   |
| Antioxidant processes | Accumulated stomatal O <sub>3</sub> flux above which N is only allocated to antioxidant pool ( $fst_{end}$ ) | 45000  | 45000  | mmol O <sub>3</sub> m <sup>-2</sup> |
|                       | Modifier to customise the O <sub>3</sub> effect on antioxidants on the leaf ( $a_{leaf}$ )                   | 1      | 1      | -                                   |
|                       | Modifier to customise the O <sub>3</sub> effect on antioxidants on the stem ( $a_{stem}$ )                   | 2      | 2      | -                                   |

Table S2: The parameters that were calibrated for (changed from the default parameterisation) in DO<sub>3</sub>SE-CropN model for both calibration methods for the HD3118 cultivar

| Process   | Parameter description         | Calibrated Values |          | Unit |
|-----------|-------------------------------|-------------------|----------|------|
|           |                               | Method 1          | Method 2 |      |
| Phenology | Base temperature ( $T_b$ )    | 6.992             | 6.992    | °C   |
|           | Optimum temperature ( $T_o$ ) | 23                | 23       | °C   |

|                 |                                                                                             |         |           |                                                    |
|-----------------|---------------------------------------------------------------------------------------------|---------|-----------|----------------------------------------------------|
|                 | Maximum temperature ( $T_m$ )                                                               | 43      | 43        | °C                                                 |
|                 | Plant emergence ( $TT_{emr}$ )                                                              | 80      | 80        | °C days                                            |
|                 | Flag emergence ( $TT_{flag,emr}$ )                                                          | 764     | 764       | °C days                                            |
|                 | Start anthesis ( $TT_{astart}$ )                                                            | 1050    | 1050      | °C days                                            |
|                 | Mid-anthesis ( $TT_{amid}$ )                                                                | 1093    | 1093      | °C days                                            |
|                 | Harvest ( $TT_{harv}$ )                                                                     | 1450    | 1450      | °C days                                            |
| Photo-synthesis | Maximum carboxylation capacity at 25 °C ( $V_{cmax,25}$ )                                   | 101.6   | 101.6     | $\mu\text{mol CO}_2 \text{ m}^{-2} \text{ s}^{-1}$ |
|                 | Leaf vertical N co-efficient (kN)                                                           | 0       | 0.2       | -                                                  |
|                 | Maximum rate of electron transport at 25 °C ( $J_{max,25}$ )                                | 144     | 144       | $\mu\text{mol CO}_2 \text{ m}^{-2} \text{ s}^{-1}$ |
|                 | Parameter describing the variation in relative stomatal conductance with VPD ( $VPD_0$ )    | 3.85    | 3         | kPa                                                |
|                 | m ( $m$ )                                                                                   | 8.1     | 7.586     | -                                                  |
| Respiration     | dark respiration ( $R_{dcoeff}$ )                                                           | 0.00726 | 0.00726   | -                                                  |
|                 | growth respiration ( $R_g$ )                                                                | 0.2     | 0.15      | -                                                  |
| DM parameters   | Coefficient for determining DM partitioning ( $\alpha_{root}$ )                             | 16      | 16        | -                                                  |
|                 | Coefficient for determining DM partitioning ( $\beta_{root}$ )                              | -21.5   | -20.5     | -                                                  |
|                 | Coefficient for determining DM partitioning ( $\alpha_{leaf}$ )                             | 17.5    | 18        | -                                                  |
|                 | Coefficient for determining DM partitioning ( $\beta_{leaf}$ )                              | -19.921 | -20       | -                                                  |
|                 | Coefficient for determining DM partitioning ( $\alpha_{stem}$ )                             | 15.15   | 16.6      | -                                                  |
|                 | Coefficient for determining DM partitioning ( $\beta_{stem}$ )                              | -15.714 | -16.5     | -                                                  |
|                 | Coefficient determining specific leaf area ( $\Omega$ )                                     | 22.2    | 22.2      | $\text{m}^2 \text{ kg}^{-1}$                       |
|                 | Fraction of stem carbon in the reserve pool ( $\tau$ )                                      | 0.7     | 0.7       | -                                                  |
|                 | Fraction of DM in the harvest pool that goes to the grains (rest goes to the ear) ( $E_g$ ) | 0.85    | 0.85      | -                                                  |
| Ozone damage    | O <sub>3</sub> long term damage coefficient ( $\gamma_3$ )                                  | 0.00008 | 0.0000377 | $(\mu\text{mol O}_3 \text{ m}^{-2})^{-1}$          |
|                 | O <sub>3</sub> long term damage coefficient determining senescence onset ( $\gamma_4$ )     | 0.9938  | 6.81      | -                                                  |
|                 | O <sub>3</sub> long term damage coefficient determining maturity ( $\gamma_5$ )             | 0.92    | 1.4       | -                                                  |

|                            |                                                                                                               |         |        |                                      |
|----------------------------|---------------------------------------------------------------------------------------------------------------|---------|--------|--------------------------------------|
|                            | Critical accumulated stomatal O <sub>3</sub> flux that determines the onset of leaf senescence ( $cL_{O_3}$ ) | 12000   | 8500   | $\text{mmol O}_3 \text{m}^{-2}$      |
| N uptake                   | Pre-anthesis maximum N uptake ( $NUP_{pre,max}$ )                                                             | 0.65    | 0.5    | $\text{g N m}^{-2} \text{day}^{-1}$  |
|                            | Post-anthesis maximum N uptake ( $NUP_{post,max}$ )                                                           | 0.4     | 0.2    | $\text{g N m}^{-2} \text{day}^{-1}$  |
| Leaf and stem N parameters | Target leaf N concentration ( $[N_{leaf,target}]$ )                                                           | 1       | 1.2    | $\text{g N m}^{-2} \text{leaf area}$ |
|                            | Target stem N concentration ( $[N_{stem,target}]$ )                                                           | 0.025   | 0.02   | $\text{N g}^{-1} \text{DW}$          |
| Grain N parameters         | Ratio of N in grain to ear ( $f_{N,ear\_grain}$ )                                                             | 0.95    | 0.95   | -                                    |
|                            | Alpha parameter controlling sigmoid N grain filling function ( $\alpha_N$ )                                   | 23      | 23     | -                                    |
|                            | Beta parameter controlling sigmoid N grain filling function ( $\beta_N$ )                                     | 1.2     | 1.2    | -                                    |
| N re-mobilisation          | Gradient of N remobilisation from the leaf under O <sub>3</sub> exposure ( $m_{leaf}$ )                       | 0.2     | 0.2    | -                                    |
|                            | Intercept of N remobilisation from the leaf under O <sub>3</sub> exposure ( $c_{leaf}$ )                      | 10.89   | 10.89  | -                                    |
|                            | Gradient of N remobilisation from the stem under O <sub>3</sub> exposure ( $m_{stem}$ )                       | 0.2293  | 0.0335 | -                                    |
|                            | Intercept of N remobilisation from the stem under O <sub>3</sub> exposure ( $c_{stem}$ )                      | 0.03425 | 0.15   | -                                    |

|                       |                                                                                                                 |       |       |                                     |
|-----------------------|-----------------------------------------------------------------------------------------------------------------|-------|-------|-------------------------------------|
|                       | Accumulated stomatal O <sub>3</sub> flux above which N is only allocated to antioxidant pool ( $f_{st_{end}}$ ) | 35000 | 75000 | mmol O <sub>3</sub> m <sup>-2</sup> |
| Antioxidant processes | Modifier to customise the O <sub>3</sub> effect on antioxidants on the leaf ( $a_{leaf}$ )                      | 0.6   | 1     | -                                   |
|                       | Modifier to customise the O <sub>3</sub> effect on antioxidants on the stem ( $a_{stem}$ )                      | 10    | 2     | -                                   |

## Senescence

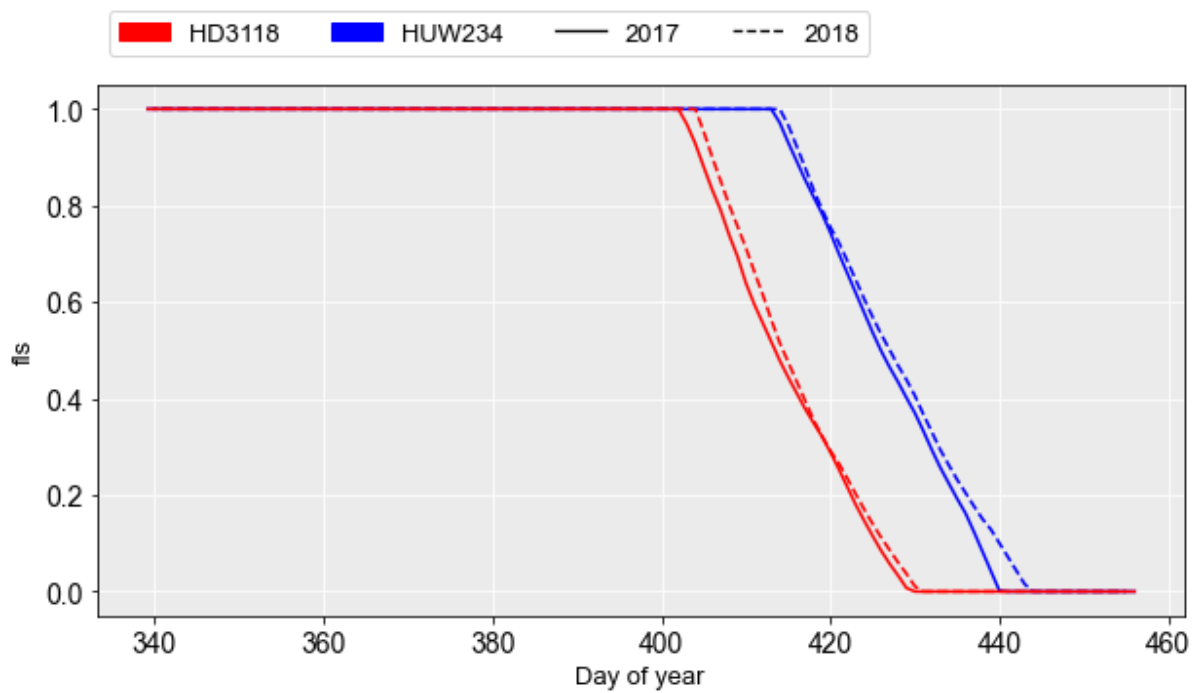

Figure S11: Graph of  $fls$ , the factor describing leaf senescence, where 0 is full senescence and 1 is no senescence, for both cultivars and years
